# Supplementary material for: Destruction and recovery of a nanorod conductive network in polymer nanocomposites via molecular dynamics simulation
Source: Royal Society of Chemistry journal article supplement (doi:10.1039/c5sm02803e), 2016-01-01
Supplement: c5sm02803e1.pdf [file c5sm02803e1.pdf]

## Supporting Information

### **Destruction and recovery of nanorod conductive network in polymer nanocomposites via molecular dynamics simulation**

Yangyang Gao<sup>1</sup>, Dapeng Cao<sup>4</sup>, Youping Wu<sup>1,2,3</sup>, Jun Liu<sup>1,2,3\*</sup>, Liqun Zhang<sup>1, 2,3,4\*</sup>

<sup>1</sup>Key Laboratory of Beijing City on Preparation and Processing of Novel Polymer  
Materials, People's Republic of China

<sup>2</sup>Beijing Engineering Research Center of Advanced Elastomers, People's Republic of  
China

<sup>3</sup>Engineering Research Center of Elastomer Materials on Energy Conservation and  
Resources, Ministry of Education, PRC

<sup>4</sup>State Key Laboratory of Organic-Inorganic Composites, Beijing University of  
Chemical Technology, 100029 Beijing, People's Republic of China

---

\* Corresponding author: [zhanglq@mail.buct.edu.cn](mailto:zhanglq@mail.buct.edu.cn) or [liujun@mail.buct.edu.cn](mailto:liujun@mail.buct.edu.cn)

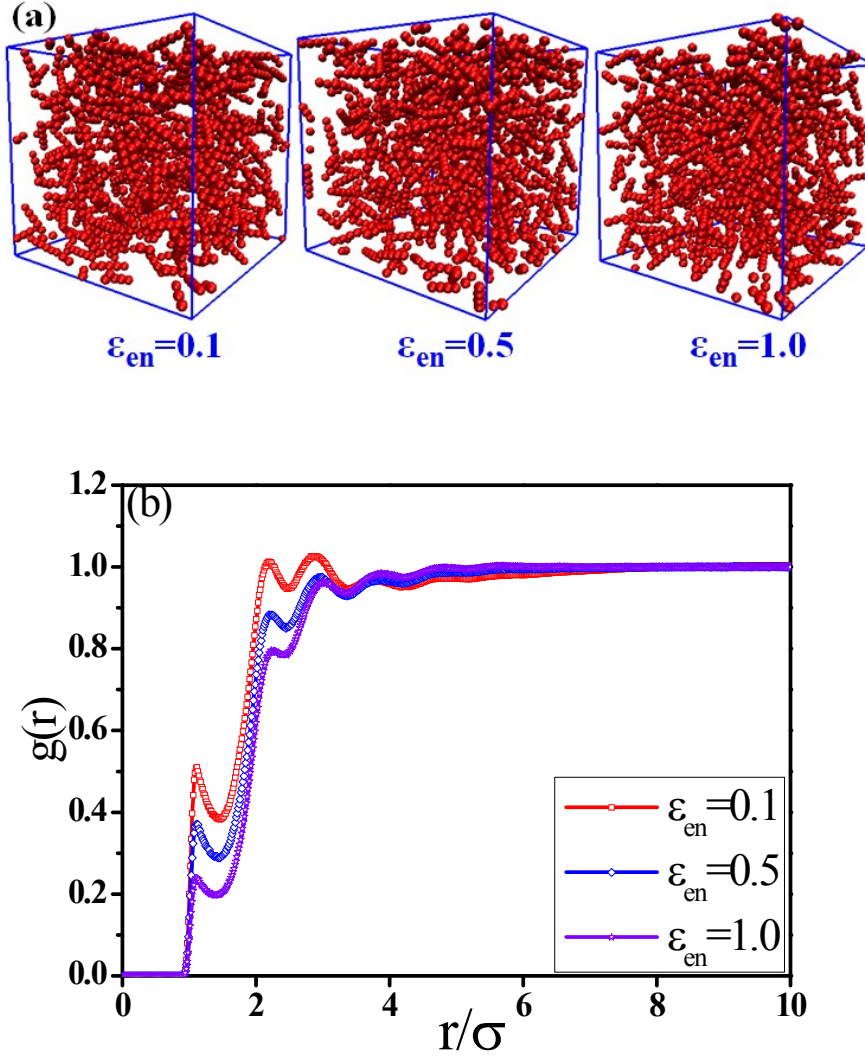

Fig. S1 (a) Snapshots of nanorods where the polymer chains are neglected for clarity; and (b) the inter-nanorod radial distribution function (RDF) for different interactions  $\epsilon_{en}$ . ( $T^*=1.0$ ,  $\varphi = 4.68\%$ ,  $M=3$ )

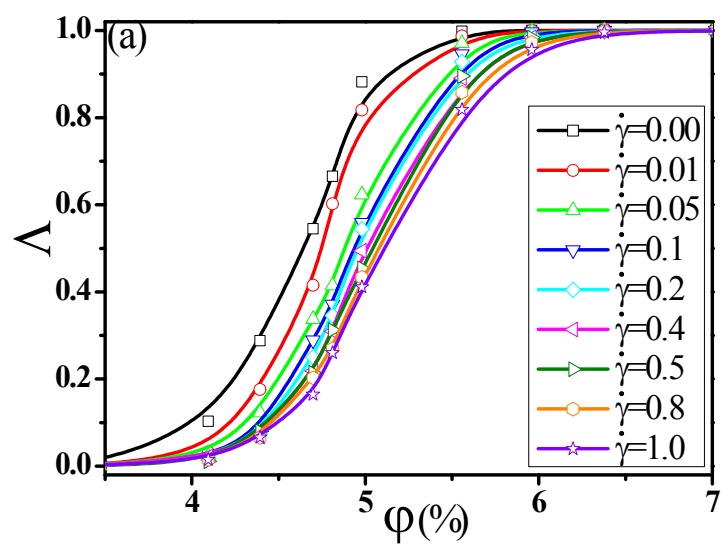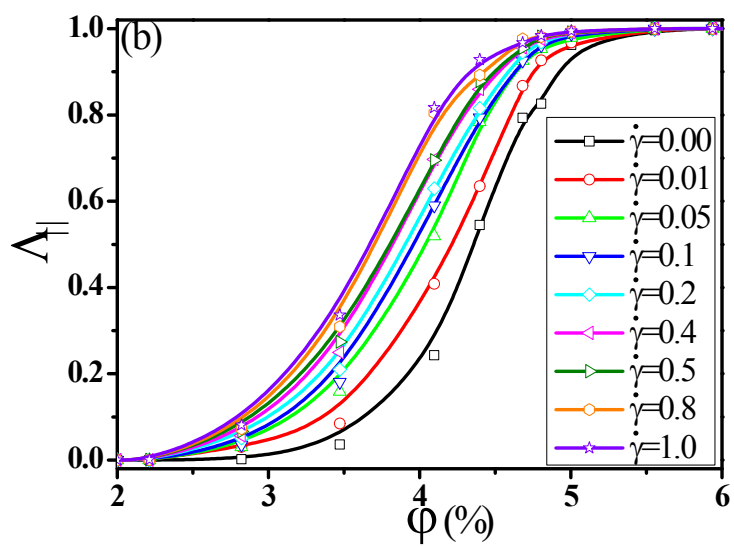

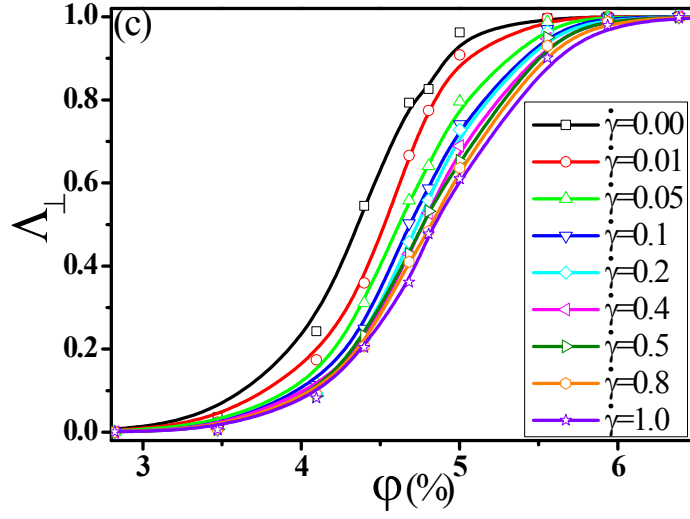

Fig. S2(a) Homogeneous conductive probability  $\Delta$ , (b) directional conductive probability  $\Delta_{\parallel}$  parallel to the shear direction, and (c) directional conductive probability  $\Delta_{\perp}$  perpendicular to the shear direction of nanocomposites as a function of nanorod volume fraction  $\Phi$  for different shear rates  $\dot{\gamma}$ . ( $T^*=1.0$ ,  $\varepsilon_{en}=0.5$ ,  $M=3$ )

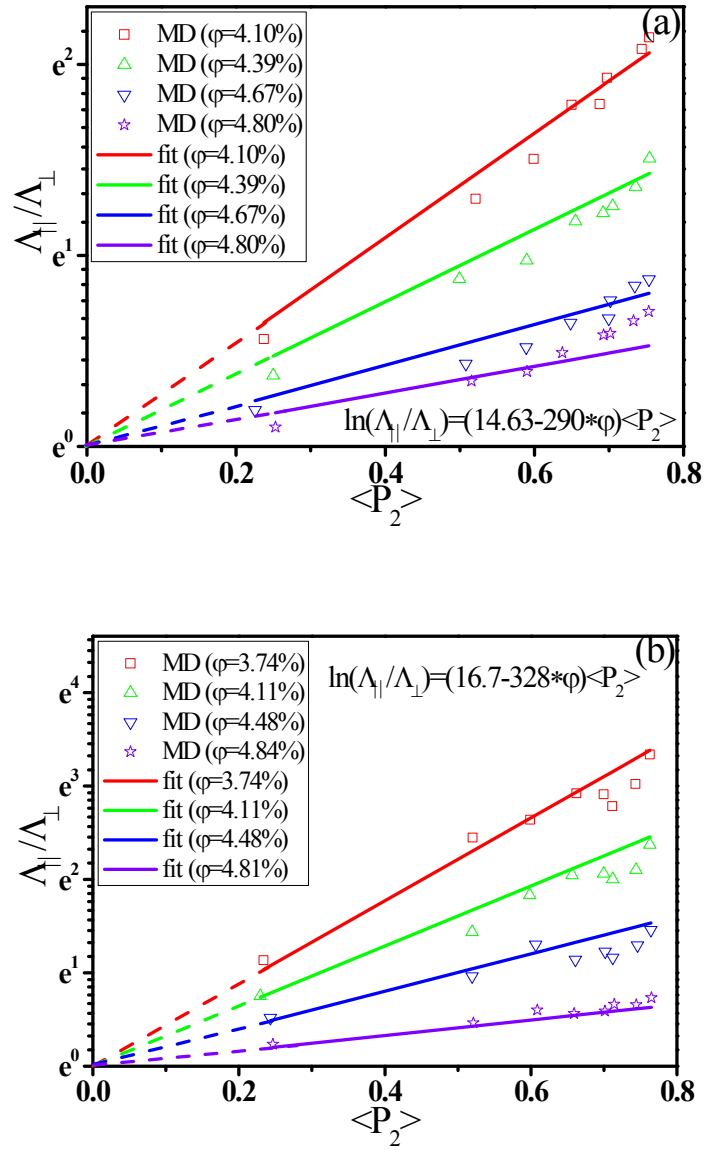

Fig. S3 The linear relation between the logarithm of anisotropy  $\Lambda_{||}/\Lambda_{\perp}$  of conductive probability and the orientation of nanorod  $\langle P_2 \rangle$  for four nanorod volume fractions  $\varphi$  for interaction (a)  $\varepsilon_{en} = 0.1$  and (b)  $\varepsilon_{en} = 1.0$ . ( $T^* = 1.0$ ,  $M=3$ )
